# Supplementary material
Source: MDPI journal article supplement (https://www.mdpi.com/2076-3417/13/8/4959)
Supplement: s1 [file s1]

## Supplementary Materials

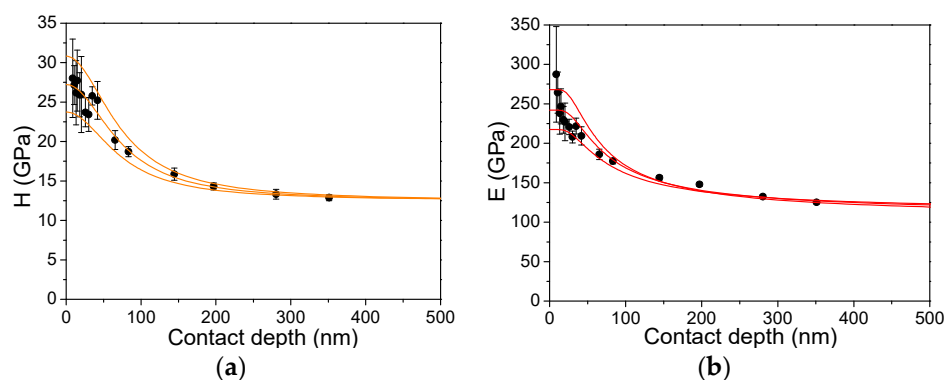

**Figure S1.** Dependence of (a) hardness and (b) Young's modulus on the indentation depth for the LPCVD BC<sub>x</sub>N<sub>y</sub> films ( $T_{\text{dep}}=773$  K).

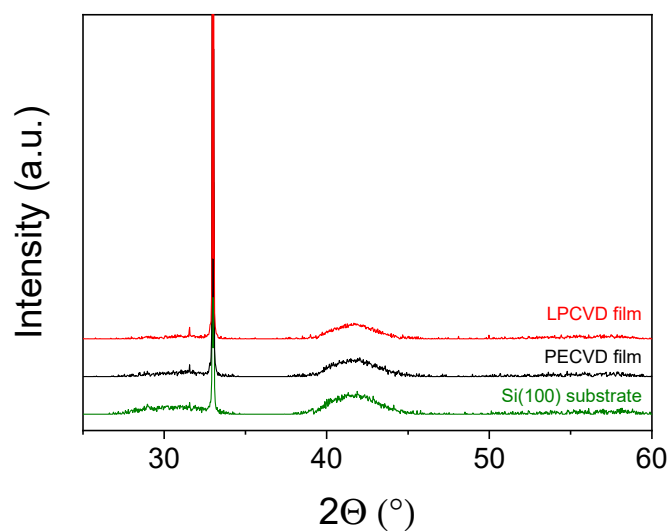

**Figure S2.** XRD patterns of Si(100) substrate and BC<sub>x</sub>N<sub>y</sub> films deposited by LPCVD and PECVD processes at 973 and 523 K, respectively.
